# Supplementary material
Source: Springer Nature journal article supplement (https://www.springermedizin.de/resource/supplementary/12879_2007_657_MOESM5_ESM.pdf/9449440)

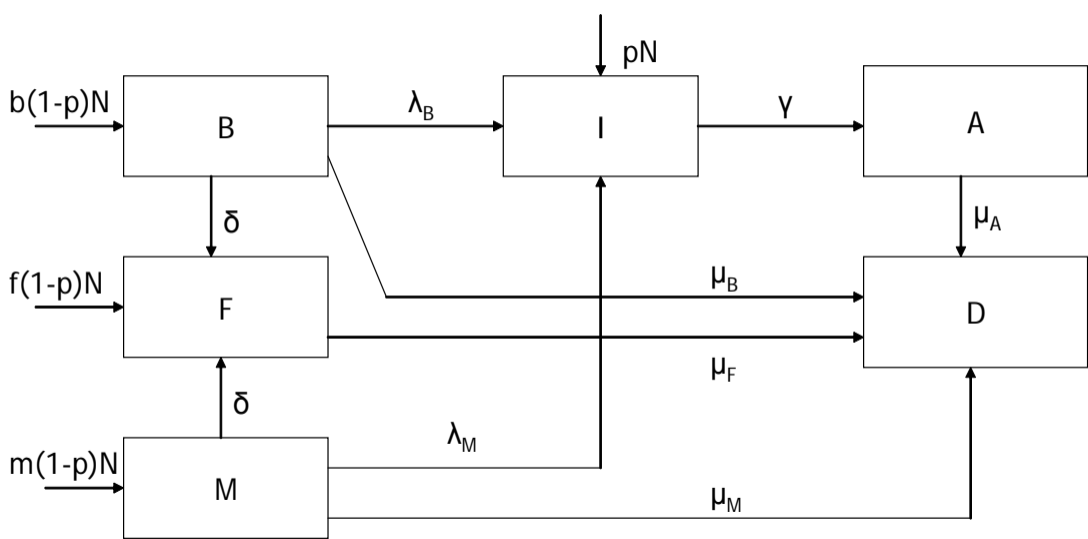

Supplement: MOESM5 [file 9449440]
